# Supplementary material
Source: PubMed Central journal article supplement (PMC2840703)
Supplement: NIHMS176013-supplement-1.pdf [file NIHMS176013-supplement-1.pdf]

**Supplementary information for:**

**Nonsense-mediated mRNA decapping occurs on polyribosomes in *Saccharomyces cerevisiae***

Wenqian Hu, Christine Petzold, Jeff Collier\*, and Kristian E. Baker\*

Center for RNA Molecular Biology, Case Western Reserve University, Cleveland, OH 44106

\*To whom correspondence should be addressed: K. Baker (keb22@case.edu) or

J. Collier (jmc71@case.edu)

**a**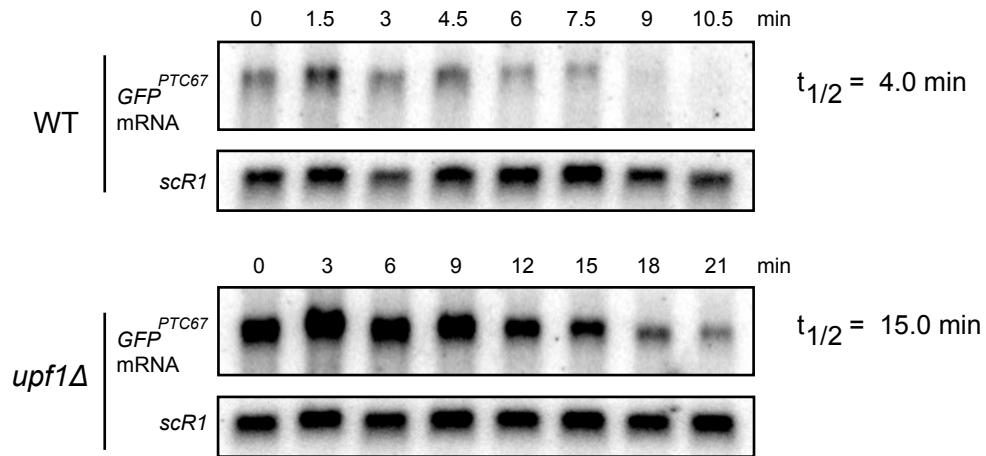**b**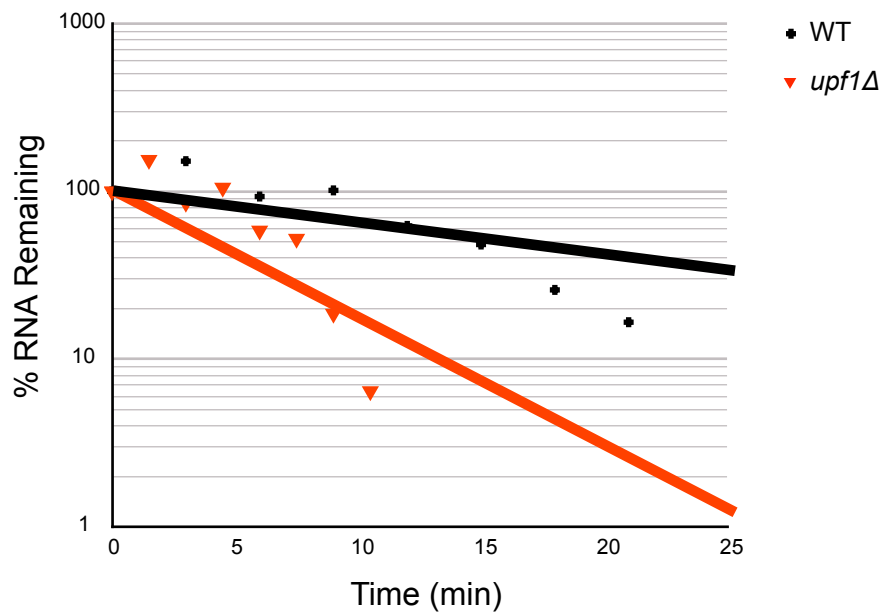

**Supplementary Figure 1** *GFP<sup>PTC67</sup>* mRNA is a substrate for nonsense-mediated mRNA decay. (a) Transcription shut-off analysis of *GFP<sup>PTC67</sup>* reporter mRNA in wild-type and *upf1Δ* cells. RNA (30  $\mu$ g) isolated from cell aliquots removed at various time points after inhibition of transcription were subject to Northern blot analysis. *GFP<sup>PTC67</sup>* mRNA and a loading control, *scR1* RNA, were detected using radiolabeled complementary oligonucleotides. (b) Quantification of mRNA levels, after normalization, measured in (a).

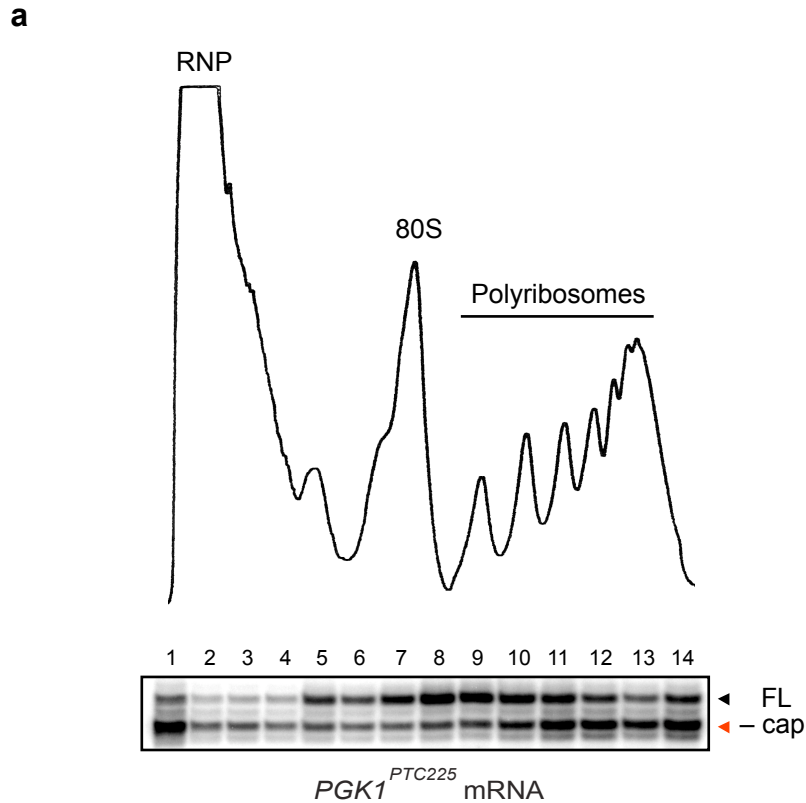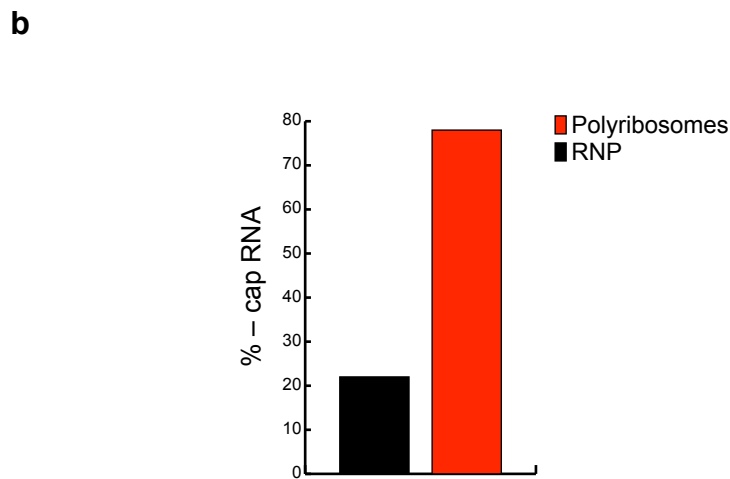

**Supplementary Figure 2** Decapped, nonsense-containing mRNA is associated with polyribosomes in *xrn1* $\Delta$  cells. **(a)** Primer extension analysis for *PGK1*<sup>PTC225</sup> mRNA was performed on RNA recovered from sucrose gradient fractions after centrifugation of lysates from *xrn1* $\Delta$  cells. RNP, 80S, and polyribosome sedimentation profiles are indicated. FL: full length mRNA; - cap: decapped mRNA. **(b)** Quantification of decapped *PGK1*<sup>PTC225</sup> mRNA in RNP versus polyribosome fractions.

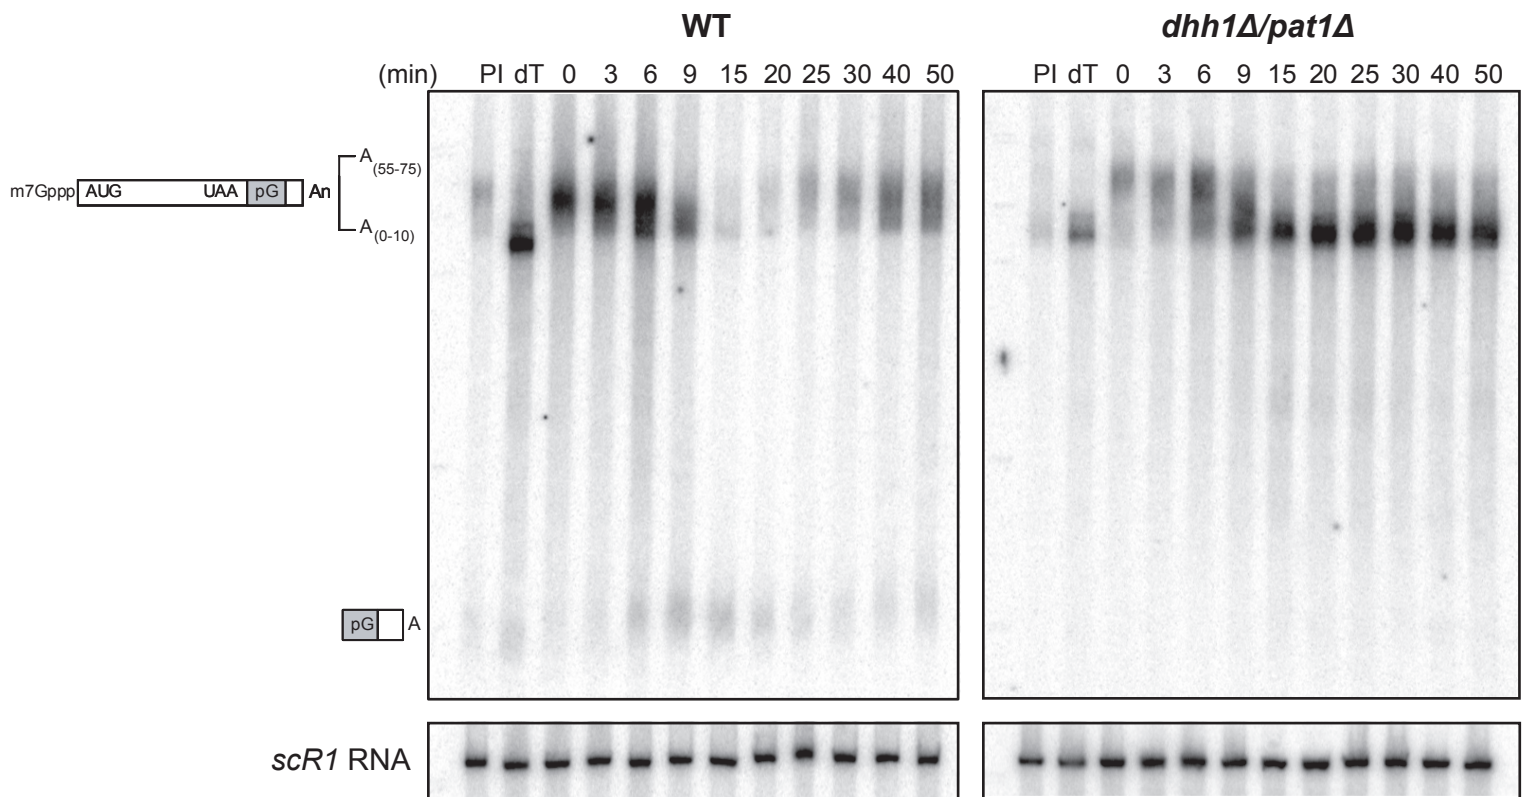

**Supplementary Figure 3** *dhh1Δ/pat1Δ* cells exhibit a strong defect in decapping of normal mRNA. Transcription pulse-chase analysis for *MFA2pG* reporter mRNA in wild-type and *dhh1Δ/pat1Δ* cells. Reporter gene expression was induced for 7 minutes and followed by inhibition of transcription. RNA, isolated from time points after inhibition of transcription, was analyzed by high resolution polyacrylamide gel electrophoresis and Northern blotting. *MFA2pG* reporter mRNA was detected using an oligonucleotide complementary to the poly(G) tract in the 3' UTR. *scR1* RNA served as a control for RNA loading. PI: pre-induction; dT: RNA treated with oligo d(T)/RNase H to delineate the migration pattern of deadenylated mRNA.

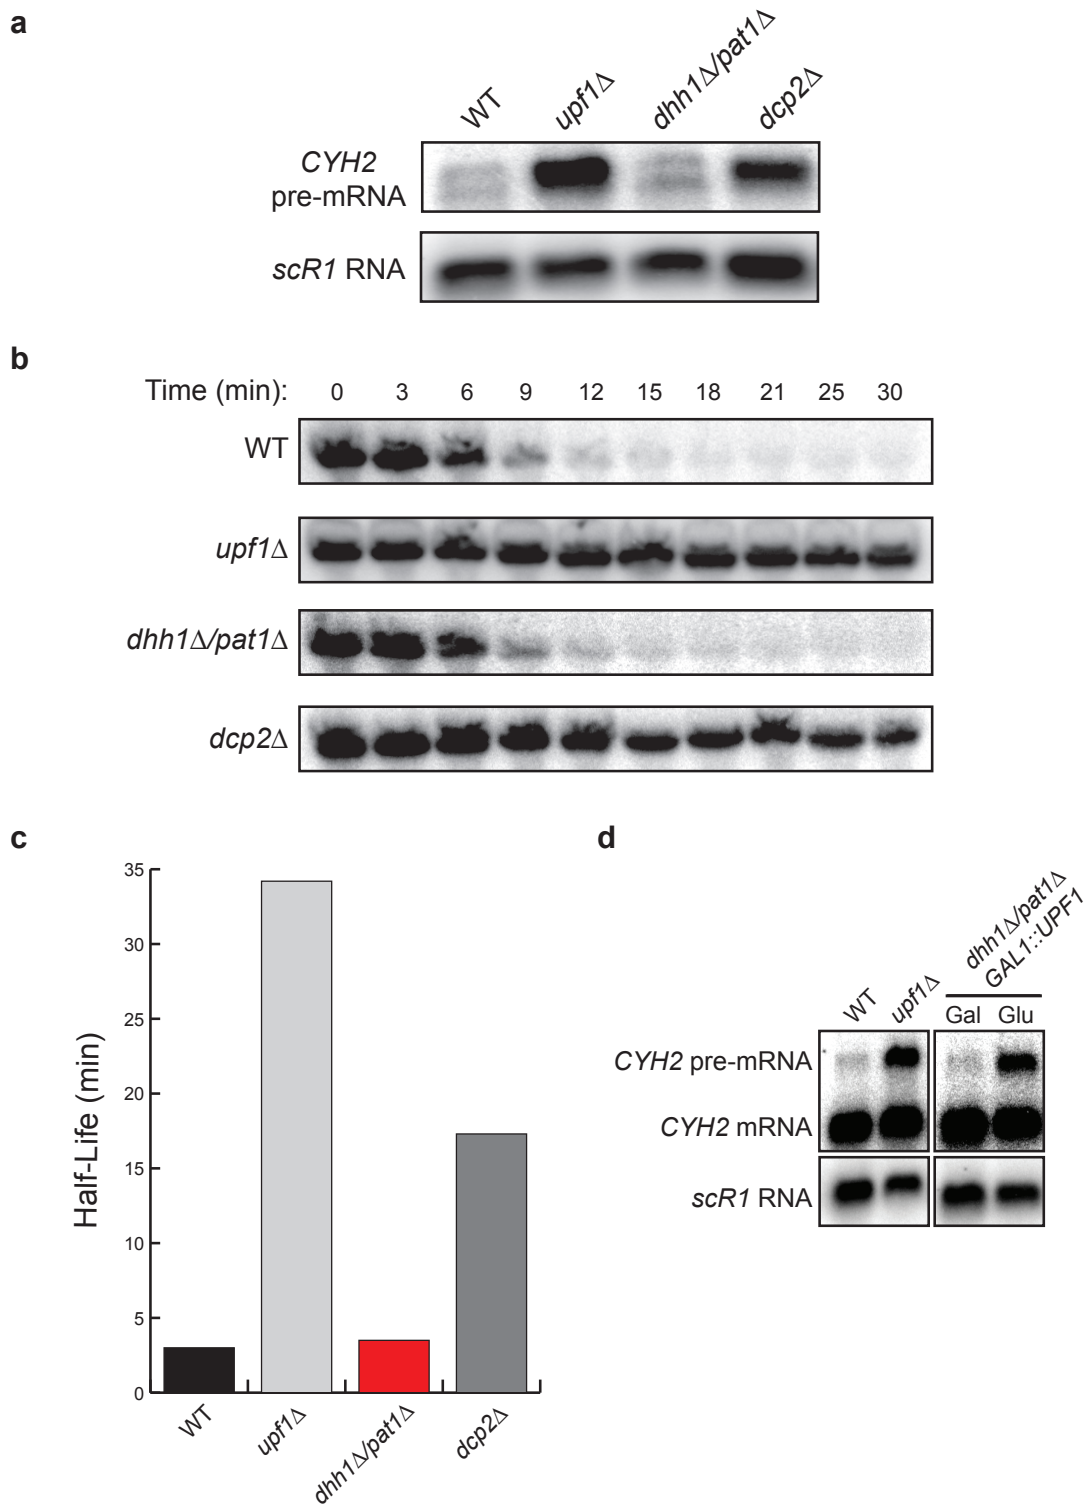

**Supplementary Figure 4** Degradation of nonsense-containing mRNA is unaffected in *dhh1*Δ/*pat1*Δ cells and dependent upon NMD. **(a)** Steady-state *CYH2* pre-mRNA levels in wild-type, *upf1*Δ, *dhh1*Δ/*pat1*Δ, and *dcp2*Δ cells were detected by Northern blot. *scR1* RNA levels serve as a control for loading. **(b)** Transcription shut-off analysis of *PGK1*<sup>PTC225</sup> mRNA in wild-type, *upf1*Δ, *dhh1*Δ/*pat1*Δ, and *dcp2*Δ cells. *PGK1*<sup>PTC225</sup> mRNA half-lives after normalization to *scR1* RNA (c). **(d)** Steady-state *CYH2* mRNA and pre-mRNA levels in wild-type, *upf1*Δ, and *dhh1*Δ/*pat1*Δ/*GAL1::UPF1* cells (*UPF1* gene under control of the galactose-inducible, *GAL1* promoter). Gal: cell grown in galactose media; Glu: cells grown in glucose media.

**Table 1. Yeast Strains, Plasmids and Oligonucleotides**

| Name   | Description                                                                                                                                                                                | Reference  |
|--------|--------------------------------------------------------------------------------------------------------------------------------------------------------------------------------------------|------------|
| yJC151 | MATa, <i>ura3Δ</i> , <i>leu2Δ</i> , <i>his3Δ</i> , <i>met15Δ</i>                                                                                                                           | EUROSCARF  |
| yJC182 | MATa, <i>ura3Δ</i> , <i>leu2Δ</i> , <i>his3Δ</i> , <i>met15Δ</i> , <i>xrn1::KanMX6</i>                                                                                                     | EUROSCARF  |
| yJC287 | CB012: MATa, <i>ade2-1</i> , <i>his3</i> , <i>leu2</i> , <i>trp1</i> , <i>ura3</i> , <i>pep4::HIS3</i> , <i>prb::HIS3</i> , <i>pre1::HIS3</i>                                              | 1          |
| yJC288 | YIT613: MATa, <i>ade2-1</i> , <i>his3</i> , <i>leu2</i> , <i>trp1</i> , <i>ura3</i> , <i>pep4::HIS3</i> , <i>prb::HIS3</i> , <i>pre1::HIS3</i> , <i>rpl25::LEU2</i> [pRPL25-Flag-URA3-CEN] | 1          |
| yJC324 | MATa, <i>ura3Δ</i> , <i>leu2Δ</i> , <i>his3Δ</i> , <i>met15Δ</i> , <i>dhh1::KanMX6</i> , <i>pat1::HIS3</i>                                                                                 | This study |
| yJC327 | MATa, <i>ura3Δ</i> , <i>leu2Δ</i> , <i>his3Δ</i> , <i>met15Δ</i> , <i>dcp2::KanMX6</i>                                                                                                     | 2          |
| yJC443 | MATa, <i>ura3Δ</i> , <i>leu2Δ</i> , <i>his3Δ</i> , <i>met15Δ</i> , <i>upf1::KanMX6</i>                                                                                                     | EUROSCARF  |
| yJC751 | MATa, <i>ura3Δ</i> , <i>leu2Δ</i> , <i>his3Δ</i> , <i>met15Δ</i> , <i>dhh1::KanMX6</i> , <i>pat1::HIS3</i> , <i>URA3::GAL1-HA-UPF1</i>                                                     | This study |
| pKB290 | GFP WT                                                                                                                                                                                     | 3          |
| pKB303 | GFP-PTC at codon 67                                                                                                                                                                        | 3          |
| pJC331 | PGK1pG                                                                                                                                                                                     | This study |
| pJC364 | PGK1-PTC225                                                                                                                                                                                | This study |
| pRP469 | MFA2pG                                                                                                                                                                                     | 4          |
| oJC591 | 5'-CGGATAAGAAAGCAACACCTGGC-3'                                                                                                                                                              | This study |
| oJC620 | 5'-GATCAATTCGTCGTCGTCGAATAAAGAAGACAA-3'                                                                                                                                                    | This study |
| oJC652 | 5'-ACCAAGGAGTTTGCATCAATGAC-3'                                                                                                                                                              | This study |
| oJC706 | 5'-GCUGAUGGCGAUGAAUGAACACUGCGUUUGCUGGCUUUGAUGAAA-3'                                                                                                                                        | This study |
| oJC707 | 5'-GCTGATGGCGATGAATGAACACTG-3'                                                                                                                                                             | This study |
| oJC809 | 5'-ACAAGATTCAATTGATTGACAACTAGTTGGACAAGGTCGACTCTATCATCA-3'                                                                                                                                  | This study |
| oJC810 | 5'-TGATGATAGAGTCGACCTTGTCCTCAACTAGTTGTCAATCAATTGAATCTTGT-3'                                                                                                                                | This study |
| oJC826 | 5'-ATTGTTTATATTTTGTGTAAGTAAGTAGATAATTACTTCCTT TTTTCATCAAAGCCAGCAAACGCAGTGTTCATTTCATCGCCATCAGC-3'                                                                                           | This study |
| oJC834 | 5'-AAAGTCACCGTCTTGGTTCTTTCATTCCCT-3'                                                                                                                                                       | This study |
| oJC836 | 5'-TGGAAGGCATTCTTGATTAGTTGGATGA TTTTCATCAAAGCCAGCAAACGCAGTGTTCATTTCATCGCCATCAGC-3'                                                                                                         | This study |
| oJC838 | 5'-GCTCTCATTTTCGATTGAATCGATGTGGTCT TTTTCATCAAAGCCAGCAAACGCAGTGTTCATTTCATCGCCATCAGC-3'                                                                                                      | 2          |
| oJC839 | 5'-CTGGCTCTCACCTTCCGTCTCTTCTCTTA-3'                                                                                                                                                        | 2          |
| oKB118 | 5'-GGAGAAGAACTCTTCACTGGAGTTGTCCC-3'                                                                                                                                                        | This study |
| oKB132 | 5'-GGGCAGATTGTGTGGACAGGTAATGGTTGTCTG-3'                                                                                                                                                    | This study |
| oKB347 | 5'-CATAACCTTCGGGCATGGCACTCTTG-3'                                                                                                                                                           | This study |
| oRP100 | 5'-GTCTAGCCGCGAGGAAGG-3'                                                                                                                                                                   | 4          |
| oRP121 | 5'-AATTCCCCCCCCCCCCCCCCCA-3'                                                                                                                                                               | 4          |

## SUPPLEMENTARY DATA

### ***GFP<sup>PTC67</sup>* reporter mRNA is degraded by NMD**

To demonstrate *GFP* reporter mRNA containing a PTC at codon 67 (*GFP<sup>PTC67</sup>*) is targeted to degradation by NMD, a transcription shut-off analysis was performed on wild-type and *upf1Δ* cells (Supplementary Fig. 1). *GFP<sup>PTC67</sup>* reporter mRNA was stabilized ~4-fold in *upf1Δ* cells (cf. 4 min versus 15 min in wild-type versus *upf1Δ* cells).

### **Decapping of normal mRNA is strongly inhibited in *dhh1Δ/pat1Δ* cells**

Deletion of the decapping activators *DHH1* and *PAT1* leads to a defect in mRNA decapping and a dramatic stabilization of normal mRNA<sup>18</sup>. To confirm that decapping of mRNA is inhibited in *dhh1Δ/pat1Δ* cells, transcription pulse-chase analysis was performed for *MFA2pG* reporter mRNA in wild-type and *dhh1Δ/pat1Δ* cells (Supplementary Fig. 2). Specifically, a brief induction of reporter mRNA transcription followed by inhibition of transcription produces a homogenous population of *MFA2pG* mRNA and decay of the mRNA is monitored over time. In wild-type cells, *MFA2pG* mRNA is deadenylated prior to the disappearance of the full-length mRNA and appearance of a decay fragment (generated by the block of 5'→3' exonucleolytic RNA digestion by the 18 nucleotide G track in the mRNA 3' UTR)<sup>18</sup>. In *dhh1Δ/pat1Δ* cells, reporter mRNA is deadenylated, however, the deadenylated mRNA is stable and accumulates over the time course and no decay fragment is detected. The stabilization of deadenylated mRNA is indicative of a defect in mRNA decapping.

### Degradation of NMD substrates is unaffected in *dhh1Δ/pat1Δ* cells

Three lines of evidence were used to demonstrate that recognition and degradation of NMD substrates are not affected in *dhh1Δ/pat1Δ* cells. First, the steady-state level of the endogenous NMD substrate, *CYH2* pre-mRNA, was unchanged in *dhh1Δ/pat1Δ* cells (as compared to wild-type cells; Supplementary Fig. 3a). In contrast, *CYH2* pre-mRNA levels increased in both NMD mutants (*upf1Δ*) and decapping defective cells (*dcp2Δ*). Second, transcription shut-off analysis for a PTC-containing reporter (*PGK1<sup>PTC225</sup>* mRNA) revealed that the mRNA half-life was identical in wild-type versus *dhh1Δ/pat1Δ* cells (Supplementary Fig. 3b & c). Inhibition of NMD (*upf1Δ*) or mRNA decapping (*dcp2Δ*) lead to dramatic stabilization of *PGK1<sup>PTC225</sup>* mRNA, demonstrating that the reporter is indeed sensitive to NMD and degraded by a decapping-dependent mechanism. Third, when UPF1 was depleted in *dhh1Δ/pat1Δ/UPF1::GAL1* cells, the level of *CYH2* pre-mRNA increased dramatically (Supplementary Fig. 3d), indicating that degradation of nonsense-containing mRNA is dependent upon UPF1 and decayed predominantly by NMD in *dhh1Δ/pat1Δ* cells. Together, these results demonstrate that the degradation of nonsense-containing mRNA in *dhh1Δ/pat1Δ* cells is unaffected and dependent upon NMD.

### SUPPLEMENTARY LITERATURE CITED

- <sup>1</sup> Inada, T. *et al.* *RNA* **8**, 948-958 (2002).
- <sup>2</sup> Hu, W., Sweet, T.J., Chamnongpol, S., Baker, K.E., & Collier, J. *Nature* **461**, 225-229 (2009).
- <sup>3</sup> Baker, K.E. & Parker, R. *RNA* **12**, 1441-1445 (2006).
- <sup>4</sup> Muhlrads, D., Decker, C.J., & Parker, R. *Mol Cell Biol* **15**, 2145-2156 (1995).
